# Supplementary material for: Functional and mutational landscapes of BRCA1 for homology-directed repair and therapy resistance
Source: eLife. 2017 Apr 11;6:e21350. doi: 10.7554/eLife.21350 (PMC5432210; doi:10.7554/eLife.21350)
Supplement: Figure 1—source data 1. — See texts and materials and methods for details. DOI: http://dx.doi.org/10.7554/eLife.21350.004 [file elife-21350-fig1-data1.xlsx]

## Sheet: BRCA1 HR all
	Fugure 1-Source Data 1. HR activities of the BRCA1 variants/mutants studied. This file also contains source data for Figures 5 and 6.
	% normalized to WT
		RWA (2011-2012)			SS										TKF				Average	Std dev	p value
		Exp1	Exp2	Exp3	2013-10-11	2013-11-08	2013-11-15	2013-11-28	2014-01-11	2014-01-18	2014-01-26	2014-01-31	2015-02-28	2015-03-13	2015-03-28	2015-04-04	2015-06-09
	VEC	12.23	11.93	11.44	19	10	21	13	23	18	14	27	24	21	38.74	33.8	34		20.7587	8.91885
	WT	100	100	100	100	100	100	100	100	100	100	100	100	100	100	100	100		100	0
	C61G	16.86	22	14								32							21.215	7.91527	0.000277024
	C64R	19.16	22.25	22.7								25							22.2775	2.40209	8.13081e-06
	Y179C	84.0757	81.2128	93.6663						109	94	94							92.6591	9.76041
	L246V	81.0324	89.7705	97.97						99	104	77							91.4622	10.744
	Q356R												98	107	97	81			95.75	10.8128
	F486L								119	86	87	105	88						97	14.5774
	R496H												95	103	115	82			98.75	13.8654
	N550H	85.0681	89.7795	83.68							95								88.3819	5.12647
	L668F	86.0516	89.7705	104.6						94	106	81							93.5704	10.053
	D693N												87			115			101	19.799
	V772A	83.0581	87.2144	80.26					94	82	96	79	87						86.0666	6.24547
	R841W	101.081	100.05	86.74						114		89							98.1742	10.9239
	P871L																		100
	M1008I												93		102	101			98.6667	4.93288
	E1038G																		100
	S1040N												90		94	101.99			95.33	6.10465
	S1101N				99				86	101	105								97.75	8.22091
	S1140G	107.161	103.15	103.878						105		112							106.238	3.5598
	K1183R																		100
	R1347G	104.135	113.62	104.874						111		99							106.526	5.81861
	M1400V	70	79	72						78									74.75	4.42531	0.00144394
	L1407P	26	22	24						24									24	1.63299	2.73346e-06
	M1411T	29.0377	25.75	19.1973						30									25.9963	4.88424	7.89424e-05
	S1512I					104	95					87							95.3333	8.5049
	T1561I					90	118					99							102.333	14.2945
	S1613G																		100
	M1628T													90	110.81	107			102.603	11.0798
	P1637L													120	96	91			102.333	15.5027
	M1652I															93	102	118	104.333	12.6623
	5055delG								20		25								22.5	3.53553	0.020529
	S1655F	6.76555	11.9095	6.59802															8.42437	3.01941	0.000362183
	C1697R	8.1211	10.4979	5.44022															8.01974	2.53037	0.000252169
	R1699Q	14.8753	19.6039	16.2683															16.9158	2.42993	0.000285
	A1708E	11.2804	11.8941	8.92493															10.6998	1.56741	0.000102677
	S1715R	8.56541	10.4979	8.89009															9.3178	1.03481	4.34042e-05
	M1775R	9.01442	12.595	8.91597															10.1751	2.09623	0.000181487
	I26A					77	64	76		71		62							70	6.81909	0.000598813
	K119R									95		104							99.5	6.36396	0.929553
	BD1							53	55										54	1.41421	0.0138374
	BD2				87			107	86										93.3333	11.8462	0.432496
	BD3				86			98	101										95	7.93725	0.389153
	BD4							84	70										77	9.89949	0.188083
	BD5				87			94	98										93	5.56776	0.161341
	BD6				118			126	111										118.333	7.50555	0.0515832
	BD7							56	53										54.5	2.12132	2.20302e-05
	BD8				27			20	27										24.6667	4.04145	0.000957976
	BD9							70	84		83								79	7.81025	0.0431453
	BD10								26		24								25	1.41421	0.00848776
																	Clone 1	Clone 2
	* 3 different new clones tested on 1/11/14
