# Supplementary material for: Functional and mutational landscapes of BRCA1 for homology-directed repair and therapy resistance
Source: eLife. 2017 Apr 11;6:e21350. doi: 10.7554/eLife.21350 (PMC5432210; doi:10.7554/eLife.21350)
Supplement: Figure 2—source data 1. — See texts and materials and methods for details. DOI: http://dx.doi.org/10.7554/eLife.21350.010 [file elife-21350-fig2-data1.xlsx]

## Sheet: BRCA1 SSA all
	Fugure 2-Source Data 1. SSA activities of the BRCA1 variants/mutants studied. This file also contains source data for Figures 5 and 6.
		SS								TKF						Average	STDV	p value
		20130303		20131128		20131208	20131215	20140111	20140118	20150508		20150516		20150526	201702
	VEC	0.18		0.11		0.11	0.14	0.13	0.15	XX		0.2526		0.218	0.237834	16.9826	5.46899
	WT	1		1		1	1	1	1	1		1		1	1	100	0
	C61G	0.33				0.36	0.37								0.408163	36.7041	3.22563	1.81992e-05
	C64R	0.29				0.45	0.36								0.244898	33.6224	8.94192	0.000331536
	Y179C	1.18				0.96				1.23		0.9597		0.816	0.897959	100.728	16.2773
	L246V	1.03				0.98				1.38		1.10105		1.23	1.06122	113.038	14.8706
	Q356R									0.94	0.97				0.9543	95.4767	1.50054
	F486L	1.1				1		1.13							1.46939	117.485	20.4074
	R496H									1.01		0.7895		1.115	0.816327	93.2707	15.6266
	N550H	1.06				0.97				1.34		1.0632		1.057	1.38776	114.633	17.276
	L668F	1.11				1.05				1.5		0.8947		1.351	1.22449	118.836	21.7438
	D693N									0.9789		0.8105		1.18	0.897959	96.684	15.7871
	V772A	1.19				0.95		1.11							0.734694	99.6173	20.0855
	R841W	1.32				1.07				1.295		1.0526		1.23	0.816327	113.065	19.0423
	P871L															100
	M1008I									1.04	1.32	1	0.9597		0.976975	105.934	14.8788
	E1038G															100
	S1040N									1.17	1.08	0.9684	0.8105		0.987441	100.327	13.4456
	S1101N					0.92	0.97	0.976667							1.55102	110.442	29.8804
	S1140G	1.31				1.1								1.132	1.22449	119.162	9.49439
	K1183R															100
	R1347G	0.93				0.98	1.12								1.06122	102.281	8.43958
	M1400V	1.18	1.44			1.6									1.30612	138.153	18.023	0.012057
	L1407P	2.4	2.39			2.59									2.44898	245.724	9.21793	3.4761e-05
	M1411T	2.64	2.61			3.14				2.958		2.56			2.61224	275.337	23.7517	4.75195e-06
	S1512I			0.91	1.03	0.8	1.08									95.5	12.5565
	T1561I			0.93	0.86	0.97	1									94	6.0553
	S1613G															100
	M1628T									1.17	1.01	1.2737	1.3632		0.935897	115.056	17.79
	P1637L									1.17	1.13	1.0211	1.1263		0.948718	107.922	9.14397
	M1652I									1.2	1.19	1.4	1.2211		1.23077	124.837	8.63015
	5055delG	0.29				0.13	0.23	0.27								23	7.11805	0.000108052
	S1655F	0.22				0.14	0.22	0.24								20.5	4.43471	2.38578e-05
	C1697R	0.18				0.16	0.22									18.6667	3.05505	0.000234986
	R1699Q	0.25				0.17	0.23									21.6667	4.16333	0.000470137
	A1708E	0.26				0.14	0.25									21.6667	6.65833	0.00119983
	S1715R	0.26				0.09	0.21									18.6667	8.73689	0.00191218
	M1775R	0.29				0.12	0.19									20	8.544	0.00189027
	I26A			1	0.89	1.03	0.97									97.25	6.0208	0.214169
	K119R					0.95	1.07	1.09								103.667	7.57188	0.244944
	BD1							0.47	0.46							46.5	0.707107	0.00297477
	BD2			1.08			1.03	1.09	0.97							104.25	5.5	0.109976
	BD3			0.79			0.68	0.8	0.82							77.25	6.29153	0.00272622
	BD4							0.73	0.67							70	4.24264	0.0317255
	BD5			0.55			0.6	0.6	0.59							58.5	2.38048	2.59366e-05
	BD6							0.99	1.14							106.5	10.6066	0.272698
	BD7			0.4			0.43	0.5	0.42							43.75	4.34933	6.3375e-05
	BD8			3.01			3.07	2.9	3.03							300.25	7.27438	6.59943e-06
	BD9							0.94	0.98							96	2.82843	0.147584
	BD10							0.22	0.27							24.5	3.53553	0.0105362
				Clone 1	Clone 2					Clone 1	Clone 2	Clone 1	Clone 2
