# Supplementary material for: Functional and mutational landscapes of BRCA1 for homology-directed repair and therapy resistance
Source: eLife. 2017 Apr 11;6:e21350. doi: 10.7554/eLife.21350 (PMC5432210; doi:10.7554/eLife.21350)
Supplement: Figure 3—source data 1. — See texts and materials and methods for details. DOI: http://dx.doi.org/10.7554/eLife.21350.012 [file elife-21350-fig3-data1.xlsx]

## Sheet: Colony formation (all)
	Fugure 3-Source Data 1. Abilities of the BRCA1 variants or mutants to support olaparib and cisplatin resistance in MDA-MB-436 cells. This file also contains source data for Figures 5 and 6.
	% normalized to WT
		RWA				BX																										Average		Std dev
		1	A	2	B	20151102				20151107				20151129				20151221		20151229				20160305				20160404
		cisplatin	olaparib	cisplatin	olaparib	cisplatin	olaparib	cisplatin	olaparib	cisplatin	olaparib	cisplatin	olaparib	cisplatin	olaparib	cisplatin	olaparib	cisplatin	olaparib	cisplatin	olaparib	cisplatin	olaparib	cisplatin	olaparib	cisplatin	olaparib	cisplatin	olaparib	cisplatin	olaparib	cisplatin	olaparib	cisplatin	olaparib
	VEC	0	0	0	0					0	0			0	0			0	0									4.47	0			0.745	0	1.82487	0
	WT	100	100	100	100	100	100			100	100			100	100			100	100	100	100			100	100			100	100			100	100	0	0
	C61G	23	0	13	0																											18	0	7.07107	0
	C64R	15	0	18	0																											16.5	0	2.12132	0
	Y179C																			94.32	106.68			101.34	99.74							97.83	103.21	4.96389	4.90732
	L246V																			105.74	103.46			104.82	95.39							105.28	99.425	0.650538	5.70635
	Q356H																			101.63	101.11	103.75	90.14									102.69	95.625	1.49907	7.75696
	F486L													117.58	118.37	90.27	98.8															103.925	108.585	19.3111	13.8381
	R496H									90.41	82.55	97	75							94.17	81.67											93.86	79.74	3.30592	4.12847
	N550H	116	98	73	98																											94.5	98	30.4056	0
	L668F	124	79.23	66	83															115.49	86.15											101.83	82.7933	31.3201	3.46463
	D693N									117.73	116.64									128.04	98.93											122.885	107.785	7.29027	12.5229
	V772A													87.52	92.04	89.54	100.3															88.53	96.17	1.42836	5.8407
	P871L																															100	100
	R841W	106	80	67	89															102.03	98.04											91.6767	89.0133	21.4626	9.02001
	M1008I									93.19	82.2	85.64	XX											102.05	89.43							93.6267	85.815	8.21371	5.11238
	S1101N	121	96	119	92															86.68	72.06	93.46	105.82									105.035	91.47	17.5194	14.183
	E1038G																															100	100
	S1040N									87.53	89.83	75.2	75.66											115.09	105.96							92.6067	90.4833	20.4238	15.1606
	S1140G	70	95	86	67																			119.01	103.89							91.67	88.63	24.9921	19.2523
	K1183R																															100	100	0	0
	R1347G																							93.15	93.71	103.34	109.74					98.245	101.725	7.20542	11.3349
	M1400V	51	2	42	0																			35.93	7.25							42.9767	3.08333	7.58232	3.74444
	L1407P	15	0	2	0																			8.45	0							8.48333	0	6.50006	0
	M1411T	31	0	26	0	0	0																	11.56	0			2.8	0			14.272	0	13.7843	0
	S1512I																			105.12	81.76	96.83	84.13									100.975	82.945	5.86192	1.67584
	T1561I																			101.55	82.16	95.46	64.67									98.505	73.415	4.30628	12.3673
	S1613G																															100	100	0	0
	M1628T									107.69	96.48	84.9	XX											114.52	98.07							102.37	97.275	15.5101	1.1243
	P1637L									83.28	66.36	105.17	66.45															83.95	86.49	77.03	60.34	87.3575	69.91	12.2771	11.4172
	M1652I																			114.94	98.9	102	96									108.47	97.45	9.14996	2.05061
	5055delG																							33.4	0			21.36	0			27.38	0	8.51357	0
	S1655F	31	0	15	0																			11.93	0							19.31	0	10.2395	0
	C1697R	4	0	0	0																			16.52	0							6.84	0	8.6184	0
	R1699Q	24	0	19	0																			30.25	4.65							24.4167	1.55	5.63656	2.68468
	A1708E	4	0	5	0																			13.15	0							7.38333	0	5.01905	0
	S1715R	31	0	33	0																			7.53	0							23.8433	0	14.1631	0
	M1775R	37	0	10	0																			12.49	0							19.83	0	14.9217	0
	I26A			40	0	25.42	6.03	34	2																							33.14	2.67667	7.32795	3.07142
	K119R	108	75	107	72	107.36	76.87																									107.453	74.6233	0.506491	2.45675
	DB1													18.2364	0			1.59495	1.84605													9.91569	0.923027	11.7673	1.30536
	DB2													84.2784	107.566			78.5617	66.1312													81.4201	86.8486	4.04228	29.2988
	DB3													68.5502	108.396			55.5399	79.3631													62.045	93.8794	9.19961	20.5292
	DB4													25.6029	17.3223			18.3419	3.39674													21.9724	10.3595	5.13428	9.84687
	DB5													78.8322	127.507			63.5852	114.64													71.2087	121.073	10.7812	9.09805
	DB6													84.5164	193.372			86.4689	203.198													85.4927	198.285	1.38065	6.94806
	DB7													25.1278	16.8759			18.7435	12.3969													21.9356	14.6364	4.51432	3.16714
	DB8													1.08618	0			0.698739	0													0.89246	0	0.273964	0
	DB9													56.8664	66.7677			44.0205	52.8382													50.4435	59.8029	9.08342	9.84964
	DB10													16.5207	2.24549			3.78183	0													10.1513	1.12274	9.00773	1.5878
	Note: Data from 2 deifferent clones analyzed in the same experiments were boxed. "XX" denoates failed experiments due to contamination or technical errors.

## Sheet: cisplatin
	% normalized to WT
		RWA		BX													Average	Std dev	p value
		1	2	20151102		20151107		20151129		20151221	20151229		20160305		20160404
		cisplatin	cisplatin	cisplatin	cisplatin	cisplatin	cisplatin	cisplatin	cisplatin	cisplatin	cisplatin	cisplatin	cisplatin	cisplatin	cisplatin	cisplatin	cisplatin	cisplatin
	VEC	0	0	0		0		0		0					4.47		0.638571	1.6895
	WT	100	100	100		100		100		100	100		100		100		100	0
	C61G	23	13														18	7.07107	0.0193851
	C64R	15	18														16.5	2.12132	0.00571753
	Y179C										94.32		101.34				97.83	4.96389
	L246V										105.74		104.82				105.28	0.650538
	Q356H										101.63	103.75					102.69	1.49907
	F486L							117.58	90.27								103.925	19.3111
	R496H					90.41	97				94.17						93.86	3.30592
	N550H	116	73														94.5	30.4056
	L668F	124	66								115.49						101.83	31.3201
	D693N					117.73					128.04						122.885	7.29027
	V772A							87.52	89.54								88.53	1.42836
	P871L																100
	R841W	106	67								102.03						91.6767	21.4626
	M1008I					93.19	85.64						102.05				93.6267	8.21371
	S1101N	121	119								86.68	93.46					105.035	17.5194
	E1038G																100
	S1040N					87.53	75.2						115.09				92.6067	20.4238
	S1140G	70	86										119.01				91.67	24.9921
	K1183R																100	0
	R1347G												93.15	103.34			98.245	7.20542
	M1400V	51	42										35.93				42.9767	7.58232	0.00292099
	L1407P	15	2										8.45				8.48333	6.50006	0.000838668
	M1411T	31	26	0									11.56		2.8		14.272	13.7843	7.75176e-05
	S1512I										105.12	96.83					100.975	5.86192
	T1561I										101.55	95.46					98.505	4.30628
	S1613G																100	0
	M1628T					107.69	84.9						114.52				102.37	15.5101
	P1637L					83.28	105.17								83.95	77.03	87.3575	12.2771
	M1652I										114.94	102					108.47	9.14996
	5055delG												33.4		21.36		27.38	8.51357	0.0263268
	S1655F	31	15										11.93				19.31	10.2395	0.00266251
	C1697R	4	0										16.52				6.84	8.6184	0.00142033
	R1699Q	24	19										30.25				24.4167	5.63656	0.000924314
	A1708E	4	5										13.15				7.38333	5.01905	0.000488738
	S1715R	31	33										7.53				23.8433	14.1631	0.00566654
	M1775R	37	10										12.49				19.83	14.9217	0.00567566
	I26A		40	25.42	34												33.14	7.32795	0.00199013
	K119R	108	107	107.36													107.453	0.506491	0.000767874
	DB1							18.2364		1.59495							9.91569	11.7673	0.0293179
	DB2							84.2784		78.5617							81.4201	4.04228	0.0485876
	DB3							68.5502		55.5399							62.045	9.19961	0.0540302
	DB4							25.6029		18.3419							21.9724	5.13428	0.0147997
	DB5							78.8322		63.5852							71.2087	10.7812	0.0823926
	DB6							84.5164		86.4689							85.4927	1.38065	0.0213883
	DB7							25.1278		18.7435							21.9356	4.51432	0.0130087
	DB8							1.08618		0.698739							0.89246	0.273964	0.000622187
	DB9							56.8664		44.0205							50.4435	9.08342	0.041027
	DB10							16.5207		3.78183							10.1513	9.00773	0.0225275
	Note: Data from 2 deifferent clones analyzed in the same experiments were boxed.

## Sheet: olaparib
	% normalized to WT
		RWA		BX													Average	Std dev	p value
		A	B	20151102		20151107		20151129		20151221	20151229		20160305		20160404
		olaparib	olaparib	olaparib	olaparib	olaparib	olaparib	olaparib	olaparib	olaparib	olaparib	olaparib	olaparib	olaparib	olaparib	olaparib	olaparib	olaparib
	VEC	0	0			0		0		0					0		0	0
	WT	100	100	100		100		100		100	100		100		100		100	0
	C61G	0	0														0	0
	C64R	0	0														0	0
	Y179C										106.68		99.74				103.21	4.90732
	L246V										103.46		95.39				99.425	5.70635
	Q356H										101.11	90.14					95.625	7.75696
	F486L							118.37	98.8								108.585	13.8381
	R496H					82.55	75				81.67						79.74	4.12847
	N550H	98	98														98	0
	L668F	79.23	83								86.15						82.7933	3.46463
	D693N					116.64					98.93						107.785	12.5229
	V772A							92.04	100.3								96.17	5.8407
	P871L																100
	R841W	80	89								98.04						89.0133	9.02001
	M1008I					82.2	XX						89.43				85.815	5.11238
	S1101N	96	92								72.06	105.82					91.47	14.183
	E1038G																100
	S1040N					89.83	75.66						105.96				90.4833	15.1606
	S1140G	95	67										103.89				88.63	19.2523
	K1183R																100	0
	R1347G												93.71	109.74			101.725	11.3349
	M1400V	2	0										7.25				3.08333	3.74444	0.0002486
	L1407P	0	0										0				0	0
	M1411T	0	0	0									0		0		0	0
	S1512I										81.76	84.13					82.945	1.67584
	T1561I										82.16	64.67					73.415	12.3673
	S1613G																100	0
	M1628T					96.48	XX						98.07				97.275	1.1243
	P1637L					66.36	66.45								86.49	60.34	69.91	11.4172
	M1652I										98.9	96					97.45	2.05061
	5055delG												0		0		0	0
	S1655F	0	0										0				0	0
	C1697R	0	0										0				0	0
	R1699Q	0	0										4.65				1.55	2.68468
	A1708E	0	0										0				0	0
	S1715R	0	0										0				0	0
	M1775R	0	0										0				0	0
	I26A		0	6.03	2												2.67667	3.07142	0.000165912
	K119R	75	72	76.87													74.6233	2.45675	0.00155479
	DB1							0		1.84605							0.923027	1.30536	0.00296537
	DB2							107.566		66.1312							86.8486	29.2988	0.319959
	DB3							108.396		79.3631							93.8794	20.5292	0.372988
	DB4							17.3223		3.39674							10.3595	9.84687	0.0246751
	DB5							127.507		114.64							121.073	9.09805	0.094314
	DB6							193.372		203.198							198.285	6.94806	0.0158983
	DB7							16.8759		12.3969							14.6364	3.16714	0.0083489
	DB8							0		0							0	0	0
	DB9							66.7677		52.8382							59.8029	9.84964	0.0546098
	DB10							2.24549		0							1.12274	1.5878	0.00361423
	Note: Data from 2 deifferent clones analyzed in the same experiments were boxed. "XX" denoates failed experiments due to contamination or technical errors.
